# Supplementary material for: Molecularly imprinted polymers on multi-walled carbon nanotubes as an efficient absorbent for preconcentration of morphine and its chemiluminometric determination
Source: Royal Society of Chemistry journal article supplement (doi:10.1039/c6ra22074f), 2016-01-01
Supplement: c6ra22074f1.pdf [file c6ra22074f1.pdf]

## Electronic supporting information

### **Molecularly imprinted polymers on multi-walled carbon nanotubes as an efficient absorbent for preconcentration of morphine and its chemiluminometric determination**

Ali Lotfi <sup>a</sup>, Sepideh Karimi <sup>b</sup>, and Javad Hassanzadeh <sup>a,\*</sup>

---

*a. Young Researchers and Elite club, Tabriz Branch, Islamic Azad University, Tabriz, Iran. Tel: +989146127692; Fax: +984133333458; Email: javadhassanzadeh63@gmail.com.*

*b. Department of Chemistry, Varamin (Pishva) Branch, Islamic Azad University, Varamin, Iran.*

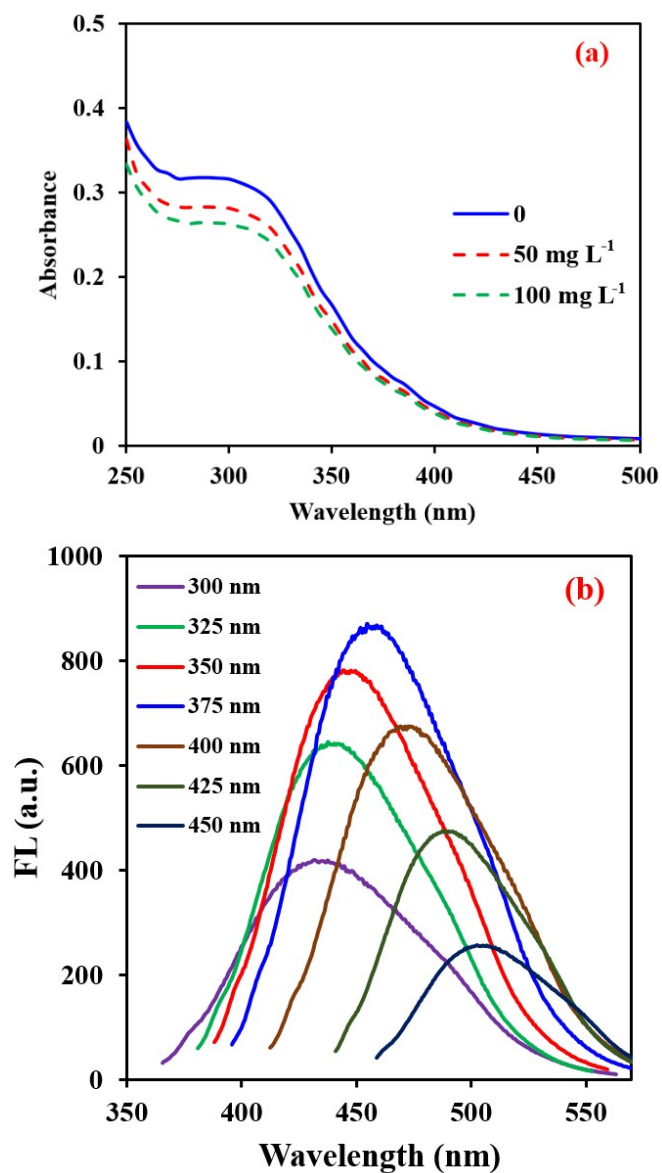

**Fig. S1** (a) UV-vis absorption spectra for prepared carbon dots in the presence of different concentrations of morphine; (b) fluorescence emission spectra for carbon dots excited at different wavelengths.

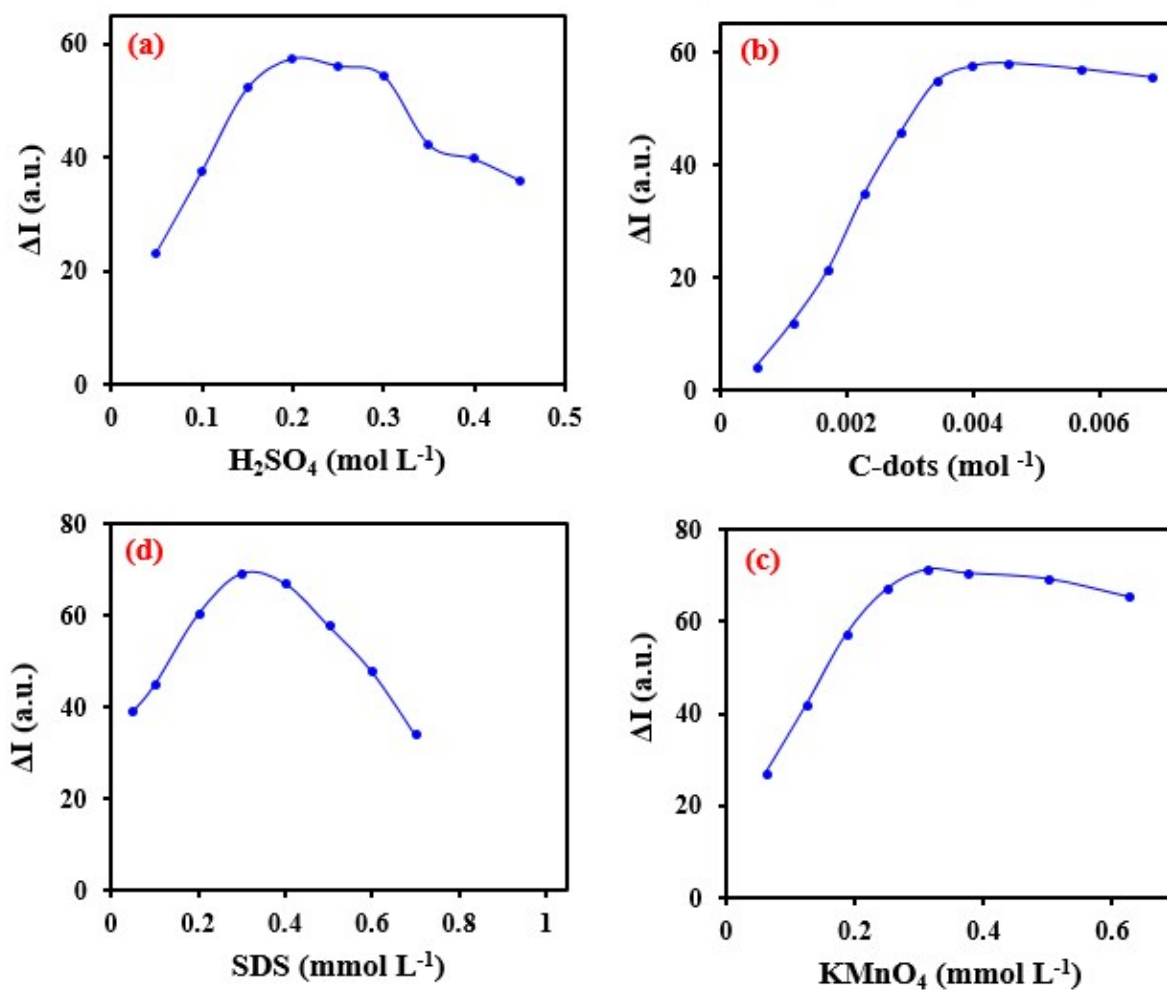

**Fig. S2** Effects of (a)  $H_2SO_4$  concentration [4 mmol L<sup>-1</sup> C-dots, 0.2 mmol L<sup>-1</sup>  $KMnO_4$ , 0.3 mmol L<sup>-1</sup> SDS], (b) C-dots concentration [0.2 mol L<sup>-1</sup>  $H_2SO_4$ , 0.2 mmol L<sup>-1</sup>  $KMnO_4$ , 0.3 mmol L<sup>-1</sup> SDS], (c)  $KMnO_4$  concentration [0.2 mol L<sup>-1</sup>  $H_2SO_4$ , 4 mmol L<sup>-1</sup> C-dots, 0.3 mmol L<sup>-1</sup> SDS] and (d) SDS concentration [0.2 mol L<sup>-1</sup>  $H_2SO_4$ , 4 mmol L<sup>-1</sup> C-dots, 0.3 mmol L<sup>-1</sup>  $KMnO_4$ ] on the  $\Delta I$  for the determination of extracted morphine (0.4 mg L<sup>-1</sup>); extraction step was done in optimum condition.

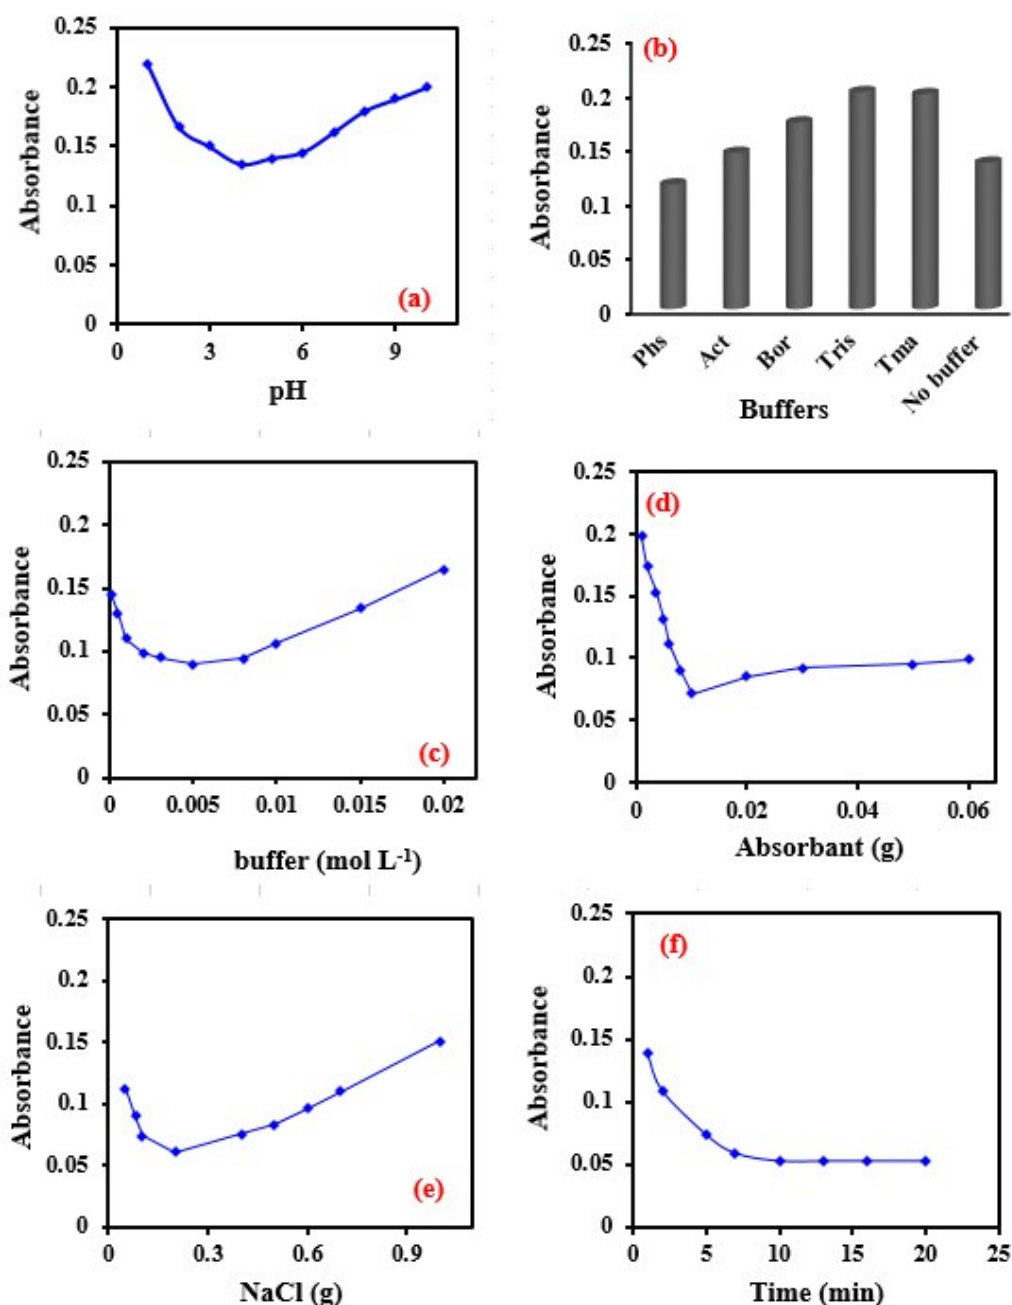

**Fig. S3** Absorption of remained extraction solution after the separation of  $0.4 \text{ mg L}^{-1}$  morphine (a) at different pHs (0.01g CNTs and 0.1 g NaCl in 30 mL solution containing  $0.02 \text{ mol L}^{-1}$  phosphate buffer); (b) at the presence of different buffers (0.01g CNTs and 0.1 g NaCl in 30 mL solution containing  $0.1 \text{ mol L}^{-1}$  buffer, pH=4); (c) at different concentrations of phosphate buffer (0.01g CNTs and 0.1 g NaCl in 30 mL solution, pH=4); (d) using different amounts of carbon nanotubes (0.1 g NaCl in 30 mL solution containing  $0.005 \text{ mol L}^{-1}$  phosphate buffer, pH=4); (e) in the presence of different amounts of NaCl (0.01 g CNTs in 30 mL solution containing  $0.005 \text{ mol L}^{-1}$  phosphate buffer, pH=4) and (f) in different exposure times.

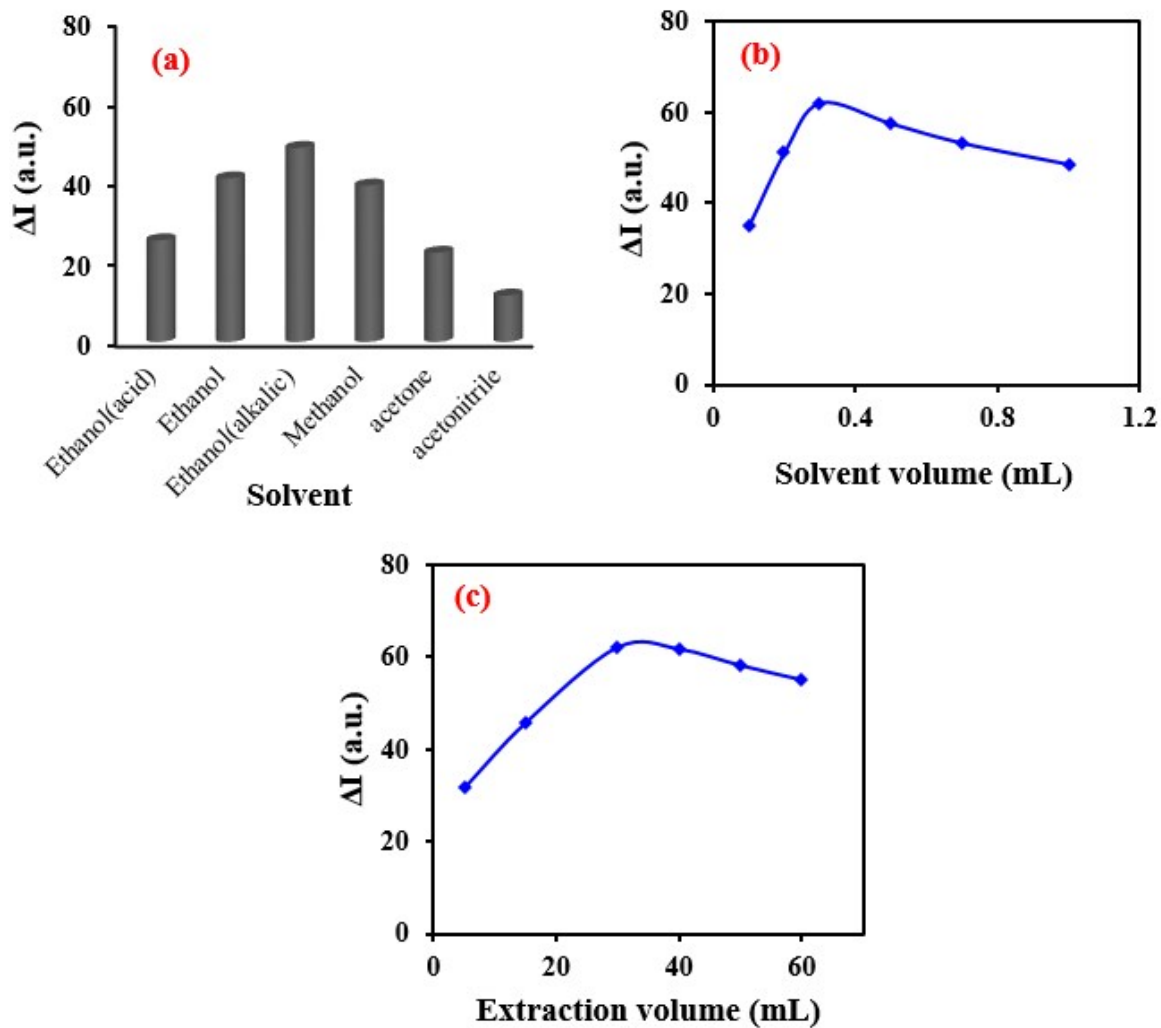

**Fig. S4** The effect of (a) type of eluent solvent, (b) eluent volume and (c) extraction solution volume on the desorption of morphine from CNTs surface and its CL signal in  $\text{KMnO}_4$ -carbon dot-SDS system (adsorption and CL system in optimum condition).

**Table S1** Interfering effect of some species on the extraction of morphine by developed method

| Coexisting substance          | Examined Concentration of coexisting substance | $\Delta A\%$ | Normal concentrations in urine (mol day <sup>-1</sup> ) |
|-------------------------------|------------------------------------------------|--------------|---------------------------------------------------------|
| K <sup>+</sup>                | 0.006                                          | 3.5          | $(1-2) \times 10^{-3}$                                  |
| Na <sup>+</sup>               | 0.17                                           | 4            | 0.11                                                    |
| Al <sup>3+</sup>              | $3.5 \times 10^{-7}$                           | 3            | $3.3 \times 10^{-7}$                                    |
| PO <sub>4</sub> <sup>3-</sup> | $4 \times 10^{-3}$                             | -4.8         | $(0.5-3) \times 10^{-3}$                                |
| Cu <sup>2+</sup>              | $10^{-6}$                                      | 3.4          | $4.8 \times 10^{-7}$                                    |
| Ca <sup>2+</sup>              | $3.3 \times 10^{-3}$                           | 1.4          | $(0.25-0.9) \times 10^{-3}$                             |
| Mg <sup>2+</sup>              | $7 \times 10^{-4}$                             | 4.5          | $(0.32-0.5) \times 10^{-3}$                             |
| Zn <sup>2+</sup>              | $2.7 \times 10^{-5}$                           | 4.3          | $(2.5-18.4) \times 10^{-6}$                             |
| Lactose                       | 0.01                                           | 0.3          | $(40-116) \times 10^{-6}$                               |
| Sucrose                       | 0.1                                            | 0.7          | -                                                       |
| Glucose                       | 1                                              | 0.2          | 0.005-0.15                                              |
| Lucien                        | $5 \times 10^{-3}$                             | 1.1          | -                                                       |
| Fe <sup>3+</sup>              | $1.5 \times 10^{-6}$                           | 3.4          | $(0.01-0.5) \times 10^{-6}$                             |
| Glycine                       | $10^{-2}$                                      | 0.78         | -                                                       |
| HCO <sub>3</sub> <sup>-</sup> | $3.2 \times 10^{-1}$                           | 4.6          | $(1-24) \times 10^{-2}$                                 |
| Uric Acid                     | $6 \times 10^{-3}$                             | 3.5          | $(1.5-4.4) \times 10^{-3}$                              |
| Cl <sup>-</sup>               | 0.3                                            | 3.5          | 0.001-0.002                                             |
| Fructose                      | 0.01                                           | 0.45         | $(0.18-0.36) \times 10^{-3}$                            |

**Table S2** Summary of some published methods for the determination of morphine

| Method            | Sample                 | LOD<br>( $\mu\text{g L}^{-1}$ ) | Linear range<br>( $\mu\text{g L}^{-1}$ ) | Ref. |
|-------------------|------------------------|---------------------------------|------------------------------------------|------|
| HPLC <sup>a</sup> | Human hair             | 0.1                             | 1-800                                    | 5    |
| ECL               | Blood plasma           | 0.067                           | 0.2-180                                  | 2    |
| Electrochemistry  | Blood plasma           | 11.6                            | $35-2.1 \times 10^5$                     | 3    |
| Electrochemistry  | Human urine and plasma | 0.828                           | 2.3-1430                                 | 4    |
| GC-MS             | Human urine            | -                               | 25-2000                                  | 9    |
| Spectrophotometry | Human urine and serum  | 30                              | 70-7980                                  | 22   |
| Spectrophotometry | Injection              | 400                             | $(1-32) \times 10^3$                     | 23   |
| Spectrophotometry | Human urine            | 23                              | 100-2500                                 | 7    |
| Spectrophotometry | urine and wastewater   | 180                             | 800-8700                                 | 24   |
| Chemiluminescence | synthetic samples      | 4                               | 10-1000                                  | 16   |
| Chemiluminescence | synthetic samples      | 3                               | 10-1000                                  | 17   |
| Our method        | Injection, human urine | 0.82                            | 3-1200                                   | -    |

<sup>a</sup> abbreviations: HPLC (High performance liquid chromatography); ECL (Electrochemiluminescence); GC-MS (Gas chromatography- mass spectroscopy); LC-MS (Liquid chromatography- mass spectroscopy).
